# Supplementary material for: Occupational Lead Exposure and Associations with Selected Cancers: The Shanghai Men’s and Women’s Health Study Cohorts
Source: PubMed Central journal article supplement (PMC4710592; doi:10.1289/ehp.1408171), 2015-06-19
Supplement: ehp.1408171.s001.acco.pdf [file ehp.1408171.s001.acco.pdf]

**Note to Readers:** *EHP* strives to ensure that all journal content is accessible to all readers. However, some figures and Supplemental Material published in *EHP* articles may not conform to 508 standards due to the complexity of the information being presented. If you need assistance accessing journal content, please contact [ehp508@niehs.nih.gov](mailto:ehp508@niehs.nih.gov). Our staff will work with you to assess and meet your accessibility needs within 3 working days.

## **Supplemental Material**

### **Occupational Lead Exposure and Associations with Selected Cancers: The Shanghai Men's and Women's Health Study Cohorts**

Linda M. Liao, Melissa C. Friesen, Yong-Bing Xiang, Hui Cai, Dong-Hee Koh, Bu-Tian Ji, Gong Yang, Hong-Lan Li, Sarah J. Locke, Nathaniel Rothman, Wei Zheng, Yu-Tang Gao, Xiao-Ou Shu, and Mark P. Purdue

#### **Table of Contents**

**Table S1.** Top ten jobs exposed to lead fume or dust in the Shanghai Women's Health Study and the Shanghai Men's Health Study.

**Table S2.** Relationship between lead and cancer risk in the Shanghai Women's Health Study.

**Table S3.** Relationship between lead and cancer risk in the Shanghai Men's Health Study.

**Table S1.** Top ten jobs exposed to lead fume or dust in the Shanghai Women's Health Study and the Shanghai Men's Health Study.

| <b>Occupation</b>                                               | <b>N exposed person-years</b> | <b>%</b> |
|-----------------------------------------------------------------|-------------------------------|----------|
| <u>SWHS</u>                                                     |                               |          |
| 863: Install/Assembly Electric/Electron Equip                   | 43589                         | 42.1     |
| 882: Welders                                                    | 11814                         | 11.4     |
| 869: Other Electric/Electron Equip Install/Maint                | 8208                          | 7.9      |
| 961: Examiners/Inspectors (Workers)                             | 4170                          | 4.0      |
| 823: Printing Workers                                           | 4006                          | 3.9      |
| 723: Foundry Workers                                            | 3685                          | 3.6      |
| 844: Metal-cut Machine Tools, Blade Sharpen                     | 3074                          | 3.0      |
| 994: Warehouse Workers                                          | 2912                          | 2.8      |
| 523: Odds-and-Ends Workers                                      | 2198                          | 2.1      |
| 093: Accounting Personnel <sup>a</sup>                          | 2094                          | 2.0      |
|                                                                 |                               | 82.9     |
| <u>SMHS</u>                                                     |                               |          |
| 863: Install/Assemble Electric/Electron Equip                   | 10931                         | 14.2     |
| 722: Rolling Mill & Machinery Operators                         | 9227                          | 12.0     |
| 721: Smelters                                                   | 6481                          | 8.4      |
| 852: Machinery Maintenance Workers (casting, welding, etc.)     | 6193                          | 8.0      |
| 869: Other Electric/Electron Equip Install/Maint (Lead Battery) | 4159                          | 5.4      |
| 842: Fitters                                                    | 3577                          | 4.6      |
| 864: Electricians                                               | 3449                          | 4.5      |
| 844: Metal-cut Machine Tools, Blade Sharpen                     | 3140                          | 4.1      |
| 961: Examiners/Inspectors                                       | 2825                          | 3.7      |
| 994: Warehouse Workers (dust in hump field)                     | 2537                          | 3.3      |
|                                                                 |                               | 68.1     |

<sup>a</sup> Includes only accounting personnel working in industries with a high probability of lead dust exposure (e.g. smelting/metalworking, electronic assembly). Lead levels for these subjects were estimated to be very low (mean lead fume = <0.001 mg/m<sup>3</sup>; mean lead dust = 0 mg/m<sup>3</sup>).

**Table S2.** Relationship between lead and cancer risk in the Shanghai Women's Health Study.

| Exposure                              | Kidney cancer cases (N) | RR (95% CI) <sup>a</sup> | Lung cancer cases (N) | RR (95% CI) <sup>a</sup> | Stomach cancer cases (N) | RR (95% CI) <sup>a</sup> | Brain cancer cases (N) | RR (95% CI) <sup>a</sup> | Meningioma cases (N) | RR (95% CI) <sup>a</sup> |
|---------------------------------------|-------------------------|--------------------------|-----------------------|--------------------------|--------------------------|--------------------------|------------------------|--------------------------|----------------------|--------------------------|
| <b>Ever fume/dust</b>                 |                         |                          |                       |                          |                          |                          |                        |                          |                      |                          |
| Never                                 | 76                      | 1.00                     | 440                   | 1.00                     | 292                      | 1.00                     | 34                     | 1.00                     | 38                   | 1.00                     |
| Ever                                  | 8                       | 1.25 (0.60, 2.61)        | 27                    | 0.68 (0.46, 1.00)        | 19                       | 0.69 (0.43, 1.10)        | 8                      | 2.58 (1.18, 5.63)        | 9                    | 2.39 (1.14, 4.98)        |
| Low                                   | 4                       | 1.27 (0.46, 3.48)        | 10                    | 0.56 (0.30, 1.05)        | 7                        | 0.55 (0.26, 1.17)        | 6                      | 4.21 (1.75, 10.1)        | 3                    | 1.66 (0.51, 5.40)        |
| High                                  | 4                       | 1.24 (0.45, 3.41)        | 17                    | 0.78 (0.48, 1.27)        | 12                       | 0.81 (0.46, 1.45)        | 2                      | 1.19 (0.28, 4.98)        | 6                    | 3.07 (1.28, 7.35)        |
| <b>Ever dust</b>                      |                         |                          |                       |                          |                          |                          |                        |                          |                      |                          |
| No                                    | 81                      | 1.00                     | 455                   | 1.00                     | 304                      | 1.00                     | 39                     | 1.00                     | 42                   | 1.00                     |
| Yes                                   | 3                       | 1.05 (0.33, 3.33)        | 12                    | 0.70 (0.39, 1.24)        | 7                        | 0.57 (0.27, 1.22)        | 3                      | 1.99 (0.61, 6.47)        | 5                    | 2.88 (1.13, 7.31)        |
| <b>Lead Dust estimates</b>            |                         |                          |                       |                          |                          |                          |                        |                          |                      |                          |
| No                                    | 81                      | 1.00                     | 455                   | 1.00                     | 304                      | 1.00                     | 39                     | 1.00                     | 42                   | 1.00                     |
| ≤median                               | 1                       | 0.84 (0.12, 6.04)        | 3                     | 0.46 (0.15, 1.44)        | 3                        | 0.64 (0.20, 1.98)        | 1                      | 1.73 (0.24, 12.6)        | 1                    | 1.46 (0.20, 10.62)       |
| >median                               | 2                       | 1.20 (0.29, 4.89)        | 9                     | 0.84 (0.43, 1.63)        | 4                        | 0.54 (0.20, 1.44)        | 2                      | 2.15 (0.51, 8.97)        | 4                    | 3.81 (1.35, 10.72)       |
| <b>Ever dust-10 y lag</b>             |                         |                          |                       |                          |                          |                          |                        |                          |                      |                          |
| No                                    | 81                      | 1.00                     | 455                   | 1.00                     | 304                      | 1.00                     | 39                     | 1.00                     | 42                   | 1.00                     |
| Yes                                   | 3                       | 1.05 (0.33, 3.33)        | 12                    | 0.70 (0.39, 1.24)        | 7                        | 0.57 (0.27, 1.22)        | 3                      | 1.99 (0.61, 6.48)        | 5                    | 2.88 (1.13, 7.31)        |
| <b>Lead Dust estimates - 10 y lag</b> |                         |                          |                       |                          |                          |                          |                        |                          |                      |                          |
| No                                    | 81                      | 1.00                     | 455                   | 1.00                     | 304                      | 1.00                     | 39                     | 1.00                     | 42                   | 1.00                     |
| ≤median                               | 2                       | 1.68 (0.41, 6.85)        | 3                     | 0.46 (0.15, 1.44)        | 3                        | 0.64 (0.20, 1.98)        | 1                      | 1.73 (0.24, 12.6)        | 1                    | 1.46 (0.20, 10.62)       |
| >median                               | 1                       | 0.60 (0.08, 4.30)        | 9                     | 0.84 (0.43, 1.63)        | 4                        | 0.54 (0.20, 1.44)        | 2                      | 2.15 (0.51, 8.97)        | 4                    | 3.81 (1.35, 10.72)       |
| <b>Ever dust-20 y lag</b>             |                         |                          |                       |                          |                          |                          |                        |                          |                      |                          |
| No                                    | 82                      | 1.00                     | 455                   | 1.00                     | 304                      | 1.00                     | 39                     | 1.00                     | 42                   | 1.00                     |
| Yes                                   | 2                       | 0.72 (0.18, 2.94)        | 12                    | 0.72 (0.40, 1.28)        | 7                        | 0.60 (0.28, 1.26)        | 3                      | 2.07 (0.64, 6.75)        | 5                    | 3.04 (1.19, 7.72)        |
| <b>Lead Dust estimates - 20 y lag</b> |                         |                          |                       |                          |                          |                          |                        |                          |                      |                          |
| No                                    | 82                      | 1.00                     | 455                   | 1.00                     | 304                      | 1.00                     | 39                     | 1.00                     | 42                   | 1.00                     |
| ≤median                               | 1                       | 0.84 (0.12, 6.06)        | 4                     | 0.63 (0.23, 1.68)        | 3                        | 0.65 (0.21, 2.02)        | 1                      | 1.76 (0.24, 12.8)        | 1                    | 1.48 (0.20, 10.77)       |
| >median                               | 1                       | 0.63 (0.09, 4.55)        | 8                     | 0.78 (0.38, 1.56)        | 4                        | 0.56 (0.21, 1.51)        | 2                      | 2.27 (0.54, 9.52)        | 4                    | 4.14 (1.47, 11.67)       |

| Exposure                            | Kidney cancer cases (N) | RR (95% CI) <sup>a</sup> | Lung cancer cases (N) | RR (95% CI) <sup>a</sup> | Stomach cancer cases (N) | RR (95% CI) <sup>a</sup> | Brain cancer cases (N) | RR (95% CI) <sup>a</sup> | Meningioma cases (N) | RR (95% CI) <sup>a</sup> |
|-------------------------------------|-------------------------|--------------------------|-----------------------|--------------------------|--------------------------|--------------------------|------------------------|--------------------------|----------------------|--------------------------|
| <b>Ever fume</b>                    |                         |                          |                       |                          |                          |                          |                        |                          |                      |                          |
| No                                  | 76                      | 1.00                     | 442                   | 1.00                     | 294                      | 1.00                     | 35                     | 1.00                     | 38                   | 1.00                     |
| Yes                                 | 8                       | 1.37 (0.66, 2.86)        | 25                    | 0.67 (0.45, 1.01)        | 17                       | 0.66 (0.41, 1.09)        | 7                      | 2.37 (1.04, 5.40)        | 9                    | 2.57 (1.23, 5.37)        |
| <b>Lead Fume estimates</b>          |                         |                          |                       |                          |                          |                          |                        |                          |                      |                          |
| No                                  | 76                      | 1.00                     | 442                   | 1.00                     | 294                      | 1.00                     | 35                     | 1.00                     | 38                   | 1.00                     |
| ≤median                             | 5                       | 1.63 (0.65, 4.06)        | 10                    | 0.56 (0.30, 1.06)        | 7                        | 0.56 (0.26, 1.19)        | 5                      | 3.47 (1.34, 8.97)        | 4                    | 2.21 (0.78, 6.26)        |
| >median                             | 3                       | 1.08 (0.34, 3.46)        | 15                    | 0.78 (0.46, 1.30)        | 10                       | 0.76 (0.41, 1.44)        | 2                      | 1.32 (0.31, 5.55)        | 5                    | 2.96 (1.15, 7.64)        |
| <b>Ever fume-10 y lag</b>           |                         |                          |                       |                          |                          |                          |                        |                          |                      |                          |
| No                                  | 76                      | 1.00                     | 442                   | 1.00                     | 294                      | 1.00                     | 35                     | 1.00                     | 38                   | 1.00                     |
| Yes                                 | 8                       | 1.37 (0.66, 2.86)        | 25                    | 0.67 (0.45, 1.01)        | 17                       | 0.66 (0.41, 1.09)        | 7                      | 2.37 (1.04, 5.40)        | 9                    | 2.57 (1.23, 5.37)        |
| <b>Lead Fume estimates-10 y lag</b> |                         |                          |                       |                          |                          |                          |                        |                          |                      |                          |
| No                                  | 76                      | 1.00                     | 442                   | 1.00                     | 294                      | 1.00                     | 35                     | 1.00                     | 38                   | 1.00                     |
| ≤median                             | 5                       | 1.63 (0.65, 4.06)        | 10                    | 0.56 (0.30, 1.06)        | 7                        | 0.56 (0.26, 1.19)        | 5                      | 3.47 (1.34, 8.97)        | 4                    | 2.21 (0.78, 6.26)        |
| >median                             | 3                       | 1.08 (0.34, 3.46)        | 15                    | 0.78 (0.46, 1.30)        | 10                       | 0.76 (0.41, 1.44)        | 2                      | 1.32 (0.31, 5.55)        | 5                    | 2.96 (1.15, 7.64)        |
| <b>Ever fume-20 y lag</b>           |                         |                          |                       |                          |                          |                          |                        |                          |                      |                          |
| No                                  | 78                      | 1.00                     | 444                   | 1.00                     | 294                      | 1.00                     | 35                     | 1.00                     | 38                   | 1.00                     |
| Yes                                 | 6                       | 1.03 (0.45, 2.38)        | 23                    | 0.63 (0.41, 0.96)        | 17                       | 0.68 (0.42, 1.12)        | 7                      | 2.44 (1.07, 5.56)        | 9                    | 2.68 (1.28, 5.60)        |
| <b>Lead Fume estimates-20 y lag</b> |                         |                          |                       |                          |                          |                          |                        |                          |                      |                          |
| No                                  | 78                      | 1.00                     | 444                   | 1.00                     | 294                      | 1.00                     | 35                     | 1.00                     | 38                   | 1.00                     |
| ≤median                             | 3                       | 0.97 (0.30, 3.08)        | 10                    | 0.57 (0.30, 1.07)        | 8                        | 0.65 (0.32, 1.32)        | 5                      | 3.52 (1.36, 9.08)        | 5                    | 2.84 (1.11, 7.29)        |
| >median                             | 3                       | 1.10 (0.34, 3.51)        | 13                    | 0.69 (0.40, 1.20)        | 9                        | 0.71 (0.37, 1.39)        | 2                      | 1.38 (0.33, 5.80)        | 4                    | 2.50 (0.88, 7.11)        |

<sup>a</sup>Adjusted for education, income level, lifetime pack-years of cigarette use, and menopause status (women only).

**Table S3.** Relationship between lead and cancer risk in the Shanghai Men's Health Study.

| Exposure                              | Kidney cancer cases (N) | RR (95% CI) <sup>a</sup> | Lung cancer cases (N) | RR (95% CI) <sup>a</sup> | Stomach cancer cases (N) | RR (95% CI) <sup>a</sup> | Brain cancer cases (N) | RR (95% CI) <sup>a</sup> | Meningioma cases (N) | RR (95% CI) <sup>a</sup> |
|---------------------------------------|-------------------------|--------------------------|-----------------------|--------------------------|--------------------------|--------------------------|------------------------|--------------------------|----------------------|--------------------------|
| <b>Ever fume/dust</b>                 |                         |                          |                       |                          |                          |                          |                        |                          |                      |                          |
| Never                                 | 81                      | 1.00                     | 460                   | 1.00                     | 293                      | 1.00                     | 33                     | 1.00                     | 12                   | 1.00                     |
| Ever                                  | 9                       | 1.56 (0.78, 3.11)        | 47                    | 1.24 (0.91, 1.67)        | 30                       | 1.35 (0.92, 1.96)        | 2                      | 0.90 (0.22, 3.78)        | 0                    | -                        |
| Low                                   | 1                       | 0.45 (0.06, 3.23)        | 12                    | 0.95 (0.53, 1.68)        | 7                        | 0.91 (0.43, 1.92)        | 1                      | 1.16 (0.16, 8.53)        | 0                    | -                        |
| High                                  | 8                       | 2.26 (1.09, 4.70)        | 35                    | 1.38 (0.98, 1.95)        | 23                       | 1.58 (1.03, 2.42)        | 1                      | 0.74 (0.10, 5.42)        | 0                    | -                        |
| <b>Ever dust</b>                      |                         |                          |                       |                          |                          |                          |                        |                          |                      |                          |
| No                                    | 87                      | 1.00                     | 493                   | 1.00                     | 315                      | 1.00                     | 33                     | 1.00                     | 12                   | 1.00                     |
| Yes                                   | 3                       | 1.50 (0.48, 4.76)        | 14                    | 1.12 (0.66, 1.91)        | 8                        | 1.06 (0.52, 2.14)        | 2                      | 2.89 (0.69, 12.1)        | 0                    | -                        |
| <b>Lead Dust estimates</b>            |                         |                          |                       |                          |                          |                          |                        |                          |                      |                          |
| No                                    | 87                      | 1.00                     | 493                   | 1.00                     | 315                      | 1.00                     | 33                     | 1.00                     | 12                   | 1.00                     |
| ≤median                               | 0                       | -                        | 10                    | 1.57 (0.84, 2.94)        | 4                        | 0.98 (0.37, 2.62)        | 1                      | 2.40 (0.33, 17.6)        | 0                    | -                        |
| >median                               | 3                       | 3.68 (1.16, 11.7)        | 4                     | 0.65 (0.24, 1.74)        | 4                        | 1.15 (0.43, 3.10)        | 1                      | 3.63 (0.49, 26.7)        | 0                    | -                        |
| <b>Ever dust-10 y lag</b>             |                         |                          |                       |                          |                          |                          |                        |                          |                      |                          |
| No                                    | 87                      | 1.00                     | 493                   | 1.00                     | 315                      | 1.00                     | 33                     | 1.00                     | 12                   | 1.00                     |
| Yes                                   | 3                       | 1.50 (0.48, 4.76)        | 14                    | 1.12 (0.66, 1.91)        | 8                        | 1.06 (0.52, 2.14)        | 2                      | 2.89 (0.69, 12.1)        | 0                    | -                        |
| <b>Lead Dust estimates - 10 y lag</b> |                         |                          |                       |                          |                          |                          |                        |                          |                      |                          |
| No                                    | 87                      | 1.00                     | 493                   | 1.00                     | 315                      | 1.00                     | 33                     | 1.00                     | 12                   | 1.00                     |
| ≤median                               | 0                       | -                        | 10                    | 1.57 (0.84, 2.94)        | 4                        | 0.98 (0.37, 2.62)        | 1                      | 2.40 (0.33, 17.6)        | 0                    | -                        |
| >median                               | 3                       | 3.68 (1.16, 11.7)        | 4                     | 0.65 (0.24, 1.74)        | 4                        | 1.15 (0.43, 3.10)        | 1                      | 3.63 (0.49, 26.7)        | 0                    | -                        |
| <b>Ever dust-20 y lag</b>             |                         |                          |                       |                          |                          |                          |                        |                          |                      |                          |
| No                                    | 87                      | 1.00                     | 493                   | 1.00                     | 315                      | 1.00                     | 33                     | 1.00                     | 12                   | 1.00                     |
| Yes                                   | 3                       | 1.50 (0.48, 4.76)        | 14                    | 1.12 (0.66, 1.91)        | 8                        | 1.06 (0.52, 2.14)        | 2                      | 2.89 (0.69, 12.1)        | 0                    | -                        |
| <b>Lead Dust estimates - 20 y lag</b> |                         |                          |                       |                          |                          |                          |                        |                          |                      |                          |
| No                                    | 87                      | 1.00                     | 493                   | 1.00                     | 315                      | 1.00                     | 33                     | 1.00                     | 12                   | 1.00                     |
| ≤median                               | 0                       | -                        | 10                    | 1.57 (0.84, 2.94)        | 4                        | 0.98 (0.37, 2.62)        | 1                      | 2.40 (0.33, 17.6)        | 0                    | -                        |
| >median                               | 3                       | 3.68 (1.16, 11.7)        | 4                     | 0.65 (0.24, 1.74)        | 4                        | 1.15 (0.43, 3.10)        | 1                      | 3.63 (0.49, 26.7)        | 0                    | -                        |

| Exposure                            | Kidney cancer cases (N) | RR (95% CI) <sup>a</sup> | Lung cancer cases (N) | RR (95% CI) <sup>a</sup> | Stomach cancer cases (N) | RR (95% CI) <sup>a</sup> | Brain cancer cases (N) | RR (95% CI) <sup>a</sup> | Meningioma cases (N) | RR (95% CI) <sup>a</sup> |
|-------------------------------------|-------------------------|--------------------------|-----------------------|--------------------------|--------------------------|--------------------------|------------------------|--------------------------|----------------------|--------------------------|
| <b>Ever fume</b>                    |                         |                          |                       |                          |                          |                          |                        |                          |                      |                          |
| No                                  | 81                      | 1.00                     | 460                   | 1.00                     | 293                      | 1.00                     | 33                     | 1.00                     | 12                   | 1.00                     |
| Yes                                 | 9                       | 1.62 (0.81, 3.24)        | 47                    | 1.27 (0.94, 1.71)        | 30                       | 1.39 (0.95, 2.03)        | 2                      | 0.94 (0.23, 3.94)        | 0                    | -                        |
| <b>Lead Fume estimates</b>          |                         |                          |                       |                          |                          |                          |                        |                          |                      |                          |
| No                                  | 81                      | 1.00                     | 460                   | 1.00                     | 293                      | 1.00                     | 33                     | 1.00                     | 12                   | 1.00                     |
| ≤median                             | 1                       | 0.47 (0.07, 3.39)        | 12                    | 0.98 (0.55, 1.74)        | 7                        | 0.95 (0.45, 2.01)        | 1                      | 1.23 (0.17, 9.01)        | 0                    | -                        |
| >median                             | 8                       | 2.34 (1.13, 4.86)        | 35                    | 1.41 (1.00, 1.99)        | 23                       | 1.62 (1.06, 2.48)        | 1                      | 0.76 (0.10, 5.60)        | 0                    | -                        |
| <b>Ever fume-10 y lag</b>           |                         |                          |                       |                          |                          |                          |                        |                          |                      |                          |
| No                                  | 81                      | 1.00                     | 461                   | 1.00                     | 293                      | 1.00                     | 33                     | 1.00                     | 12                   | 1.00                     |
| Yes                                 | 9                       | 1.64 (0.82, 3.28)        | 46                    | 1.25 (0.92, 1.69)        | 30                       | 1.40 (0.96, 2.04)        | 2                      | 0.95 (0.23, 3.98)        | 0                    | -                        |
| <b>Lead Fume estimates-10 y lag</b> |                         |                          |                       |                          |                          |                          |                        |                          |                      |                          |
| No                                  | 81                      | 1.00                     | 461                   | 1.00                     | 293                      | 1.00                     | 33                     | 1.00                     | 12                   | 1.00                     |
| ≤median                             | 1                       | 0.48 (0.07, 3.47)        | 11                    | 0.91 (0.50, 1.66)        | 7                        | 0.97 (0.46, 2.05)        | 1                      | 1.26 (0.17, 9.24)        | 0                    | -                        |
| >median                             | 8                       | 2.35 (1.13, 4.88)        | 35                    | 1.41 (1.00, 1.99)        | 23                       | 1.63 (1.06, 2.49)        | 1                      | 0.77 (0.10, 5.62)        | 0                    | -                        |
| <b>Ever fume-20 y lag</b>           |                         |                          |                       |                          |                          |                          |                        |                          |                      |                          |
| No                                  | 82                      | 1.00                     | 462                   | 1.00                     | 296                      | 1.00                     | 33                     | 1.00                     | 12                   | 1.00                     |
| Yes                                 | 8                       | 1.51 (0.73, 3.14)        | 45                    | 1.27 (0.93, 1.72)        | 27                       | 1.30 (0.88, 1.93)        | 2                      | 1.00 (0.24, 4.18)        | 0                    | -                        |
| <b>Lead Fume estimates-20 y lag</b> |                         |                          |                       |                          |                          |                          |                        |                          |                      |                          |
| No                                  | 82                      | 1.00                     | 462                   | 1.00                     | 296                      | 1.00                     | 33                     | 1.00                     | 12                   | 1.00                     |
| ≤median                             | 0                       | -                        | 10                    | 0.89 (0.47, 1.66)        | 6                        | 0.88 (0.39, 1.98)        | 1                      | 1.35 (0.18, 9.90)        | 0                    | -                        |
| >median                             | 8                       | 2.41 (1.16, 5.01)        | 35                    | 1.44 (1.02, 2.04)        | 21                       | 1.51 (0.97, 2.35)        | 1                      | 0.79 (0.11, 5.81)        | 0                    | -                        |

<sup>a</sup>Adjusted for education, income level, and lifetime pack-years of cigarette use.
